# Supplementary material
Source: Royal Society of Chemistry journal article supplement (doi:10.1039/d6ta01264g)
Supplement: d6ta01264g1.pdf [file d6ta01264g1.pdf]

## Supporting Information

### **Two-Dimensional Mercury(II)–Acetylide Framework with Built-in Dipole Field for Efficient Photocatalytic CO<sub>2</sub>-to-CO Conversion**

Mude Zhu,<sup>a,c</sup> Muchun Xu,<sup>a</sup> Lincan Fang,<sup>\*b</sup> Linli Xu<sup>\*a,c</sup>

<sup>a</sup>Department of Applied Biology and Chemical Technology and Research Institute for Smart Energy, The Hong Kong Polytechnic University (PolyU), Hung Hom, Kowloon, Hong Kong SAR, P. R. China.

<sup>b</sup>Key Laboratory of Functional Molecular Solids Ministry of Education, College of Chemistry and Materials Science, Anhui Normal University, Wuhu, Anhui, 241002, P. R. China.

<sup>c</sup>PolyU Shenzhen Research Institute, Shenzhen, 518057, P. R. China.

## Contents

|                                                                                                                                                                                                |    |
|------------------------------------------------------------------------------------------------------------------------------------------------------------------------------------------------|----|
| 1. General Information .....                                                                                                                                                                   | 3  |
| 1.1 Chemicals .....                                                                                                                                                                            | 3  |
| 1.2 Synthesis of TTED .....                                                                                                                                                                    | 3  |
| 1.3 PFM and KPFM Measurements .....                                                                                                                                                            | 3  |
| 1.4 Electrochemical Measurements .....                                                                                                                                                         | 4  |
| 1.5 Calculation of CO Production and Selectivity .....                                                                                                                                         | 4  |
| 1.6 DFT calculations .....                                                                                                                                                                     | 5  |
| 2. Supporting Figures .....                                                                                                                                                                    | 6  |
| Figure S1. (a) XPS survey spectrum and (b) high-resolution Hg 4f XPS spectrum of TTED-Hg-AF. ....                                                                                              | 6  |
| Figure S2. XRD pattern of TTED-Hg-AF. ....                                                                                                                                                     | 6  |
| Figure S3. SEM images of TTED-Hg-AF nanosheets. ....                                                                                                                                           | 6  |
| Figure S4. Thermogravimetric analysis (TGA) curve of TTED-Hg-AF. ....                                                                                                                          | 7  |
| Figure S5. AFM height images of TTED-Hg-AF obtained during KPFM measurements (a) before and (b) after light irradiation. ....                                                                  | 7  |
| Figure S6. AFM height image of TTED-Hg-AF acquired during PFM measurements. ....                                                                                                               | 7  |
| Figure S7. Valence band X-ray photoelectron spectroscopy (VB-XPS) spectrum of TTED-Hg-AF. ....                                                                                                 | 8  |
| Figure S8. Schematic energy band structure diagram of TTED-Hg-AF determined from UV-vis DRS, Mott-Schottky, and VB-XPS measurements. ....                                                      | 8  |
| Figure S9. Photoluminescence (PL) spectra of [Ru(bpy) <sub>3</sub> ]Cl <sub>2</sub> photosensitizer (PS), PS/TTED-Hg-AF, and PS/TTED-Hg-AF/TEOA systems recorded under 400 nm excitation. .... | 8  |
| Figure S10. (a) Time-dependent CO production rates for various catalytic systems over 3 h of catalysis. ....                                                                                   | 9  |
| Fig. S11. <sup>1</sup> H NMR spectrum of reacted liquid. ....                                                                                                                                  | 9  |
| Figure S12. PL spectra of TTED-Hg-AF and TTED-Hg-AF/TEOA aqueous suspensions recorded under 350 nm excitation. ....                                                                            | 9  |
| Figure S13. FTIR spectrum of TTED-Hg-AF before and after photocatalytic reaction. ....                                                                                                         | 10 |
| Figure S14. PXRD pattern of TTED-Hg-AF before and after photocatalytic reaction. ....                                                                                                          | 10 |
| Figure S15. X-ray photoelectron spectroscopy (XPS) spectrum of TTED-Hg-AF after photocatalytic reaction. ....                                                                                  | 10 |
| Figure S16. Hg <sup>2+</sup> leaching concentration after reaction. ....                                                                                                                       | 11 |
| Figure S17. Apparent quantum efficiency (AQE) of TTED-Hg-AF powder measured at under 420, 450 and 500 nm wavelengths. ....                                                                     | 11 |
| Figure S18. Total ion chromatographic (TIC) patterns for <sup>13</sup> CO <sub>2</sub> catalytic reduction. ....                                                                               | 11 |
| Figure S19. Optimized DFT geometries showing (a) *COOH and (b) *CO intermediates adsorbed on the TTED-Hg-AF surface. ....                                                                      | 12 |
| 3. References .....                                                                                                                                                                            | 13 |

## 1. General Information

### 1.1 Chemicals

All reagents were obtained from commercial suppliers and used as received without further purification. 2,7,10,15-Tetrakis(trimethylsilyl)ethynyl)dibenzo[g,p]chrysene (TTED-TMS) was purchased from Yanshen (Extension) Technology Corporation Limited. Copper(I) iodide (CuI) was supplied by J&K. Mercury(II) chloride (HgCl<sub>2</sub>) was provided by Macklin. Anhydrous chlorobenzene (99.5%) and tetrahydrofuran (THF, 99.5%) were obtained from Energy Chemical. Methanol (CH<sub>3</sub>OH, ACS grade), acetonitrile (CH<sub>3</sub>CN, ACS grade), and THF (ACS grade) were purchased from Damas-Beta. Tetrabutylammonium fluoride (TBAF, 1.0 M in THF) were obtained from Sigma Aldrich.

### 1.2 Synthesis of TTED

The trimethylsilyl protecting groups of TTED-TMS were deprotected using a TBAF solution to yield 2,7,10,15-tetrakis(ethynyl)dibenzo[g,p]chrysene (TTED). <sup>1</sup>H NMR (600 MHz, Chloroform-*d*) δ: 3.76 – 3.70 (m, 2H), 2.18 (s, 1H), 1.25 (t, *J* = 7.0 Hz, 4H). <sup>13</sup>C NMR (151 MHz, Chloroform-*d*) δ: 58.51, 18.45. MALDI-TOF: [M+H]<sup>+</sup> = 425.13, found = 424.96.

### 1.3 PFM and KPFM Measurements

Powdered TTED-Hg-AF samples were dispersed in ethanol by ultrasonication for 5 minutes. A 60 μL aliquot of the suspension was drop-cast onto a 1 × 1 cm<sup>2</sup> indium-tin-oxide (ITO) substrate and electrically connected to an iron plate using conductive silver paste. Piezoelectric amplitude and phase mapping were recorded using a Bruker Multimode 8 atomic force microscope (AFM) operating in piezoresponse force microscopy (PFM) mode. Kelvin probe force microscopy (KPFM) measurements were performed in electromagnetic mode using Pt/Ir-coated AFM tips.

## 1.4 Electrochemical Measurements

For Mott-Schottky (M–S) and electrochemical impedance spectroscopy (EIS) analyses, the working electrodes were prepared as follows: 1.0 mg of catalyst was dispersed in a mixture of 0.75 mL H<sub>2</sub>O, 0.25 mL isopropyl alcohol, and 0.03 mL Nafion solution, followed by ultrasonication for 10 min. The resulting suspension was drop-cast onto a 1 × 1 cm<sup>2</sup> ITO plate and dried to form a uniform film.

All electrochemical measurements, including piezoelectric current tests, EIS, and M–S analyses, were carried out using a CHI660E electrochemical workstation. A typical three-electrode system was employed, consisting of the sample-coated electrode as the working electrode, a platinum wire as the counter electrode, and an Ag/AgCl electrode as the reference.

## 1.5 Calculation of CO Production and Selectivity

The CO production yield and gaseous product selectivity were calculated as follows:

$$V_{CO} = \frac{A_{CO}}{7103876.45361 \times 0.3} \times 16.8 \quad (1)$$

$$m_{CO} = \frac{V_{CO}}{22.4} \times 1000 \quad (2)$$

$$V_{CH_4} = \frac{A_{CH_4}}{6451887.01031 \times 0.3} \times 16.8 \quad (3)$$

$$m_{CH_4} = \frac{V_{CH_4}}{22.4} \times 1000 \quad (4)$$

$$V_{H_2} = \frac{A_{H_2}}{10882.94151 \times 0.3} \times 16.8 \quad (5)$$

$$m_{H_2} = \frac{V_{H_2}}{22.4} \times 1000 \quad (6)$$

where  $A_{CH_4}$ ,  $A_{CO}$ , and  $A_{H_2}$  represent the chromatographic peak area of CH<sub>4</sub>, CO, and

H<sub>2</sub> products, respectively.  $V_{CH_4}$ ,  $V_{CO}$ , and  $V_{H_2}$  represent the volumes of CH<sub>4</sub>, CO, and H<sub>2</sub> in reaction vessel, respectively. Correspondingly,  $m_{CH_4}$ ,  $m_{CO}$ , and  $m_{H_2}$  denote their respective product yields (in  $\mu\text{mol}$ ), which were calculated based on the measured gas concentrations and the total volume of the reaction system.  $S$  represents the percentage selectivity of each product.

$$S_{CO} = \frac{m_{CO}}{m_{CO} + m_{CH_4} + m_{H_2}} \quad (7)$$

## 1.6 DFT calculations

All theoretical calculations were performed using the Vienna Ab Initio Simulation Package (VASP) within the framework of density functional theory (DFT).<sup>1</sup> The electron-ion interactions were described using the projector augmented wave (PAW) method,<sup>2</sup> and the Perdew–Burke–Ernzerhof (PBE) functional within the generalized gradient approximation (GGA) was employed to model exchange–correlation effects.<sup>3</sup> A kinetic energy cutoff of 550 eV was applied. Structural relaxations were considered converged when the total energy change was less than  $1 \times 10^{-4}$  eV and the maximum force on any atom was below  $0.05 \text{ eV } \text{\AA}^{-1}$ .

A representative molecular fragment of the TTED-Hg-AF framework (denoted as the “MOF part”) was extracted as the model. A  $10 \text{ \AA}$  vacuum layer was introduced along all directions, and a  $1 \times 1 \times 1$  Monkhorst–Pack  $k$ -point mesh was used.

The adsorption energy ( $\Delta E_{ads}$ ) was calculated as

$$E_{ads} = E_{total} - E_{MOF \text{ part}} - E_{adsorbate} \quad (8)$$

where  $E_{total}$ ,  $E_{MOF \text{ part}}$ , and  $E_{adsorbate}$  represent the total energies of the adsorbate-substrate system, pristine TTED-Hg-AF fragment, and isolated CO<sub>2</sub> or H<sub>2</sub> molecule, respectively. A more negative  $\Delta E_{ads}$  corresponds to stronger adsorption.

The CO<sub>2</sub> reduction pathway was modeled via four elementary steps:

1.  $\text{CO}_2 + \text{MOF-part} \rightarrow \text{MOF-part@CO}_2$
2.  $\text{MOF-part@CO}_2 + \text{H} \rightarrow \text{MOF-part@COOH}$
3.  $\text{MOF-part@COOH} + \text{H} \rightarrow \text{MOF-part@CO}$

#### 4. MOF-part@CO $\rightarrow$ MOF-part + CO

The reaction energy change ( $\Delta E$ ) for each step is given by:

$$\Delta E = E_{\text{products}} - E_{\text{reactants}} \quad (9)$$

## 2. Supporting Figures

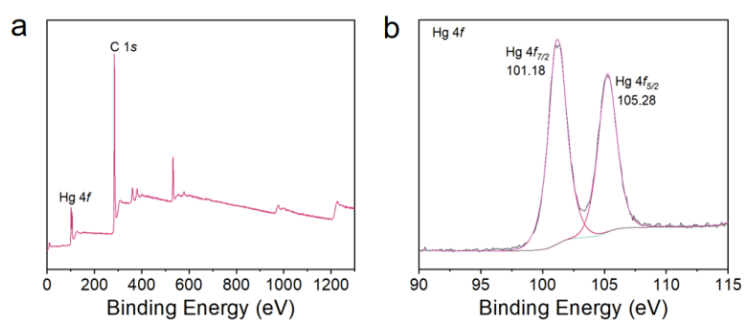

**Figure S1.** (a) XPS survey spectrum and (b) high-resolution Hg 4f XPS spectrum of TTED-Hg-AF.

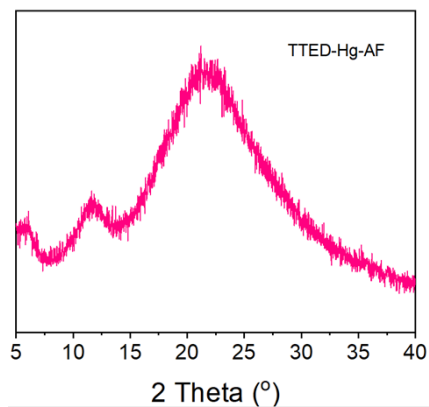

**Figure S2.** XRD pattern of TTED-Hg-AF.

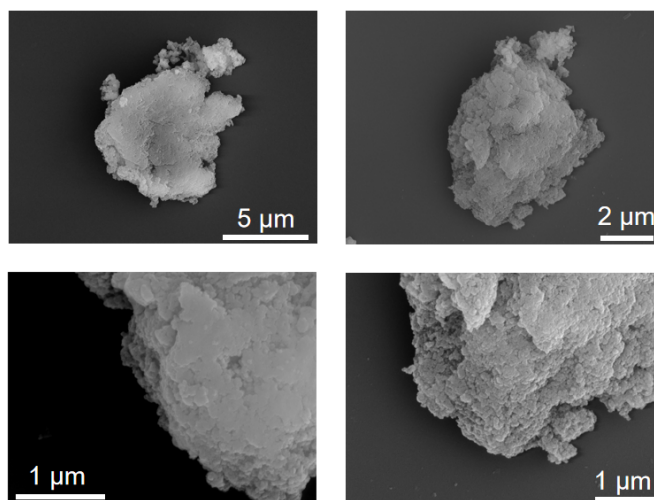

**Figure S3.** SEM images of TTED-Hg-AF nanosheets.

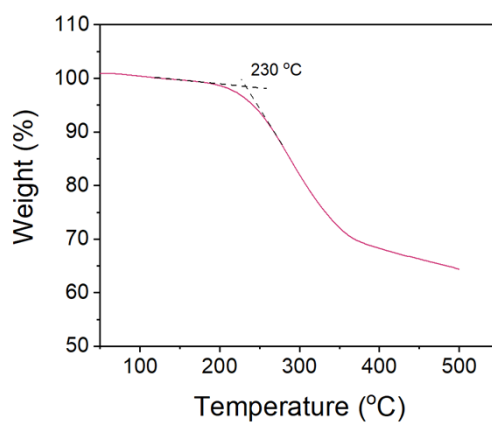

**Figure S4.** Thermogravimetric analysis (TGA) curve of TTED-Hg-AF.

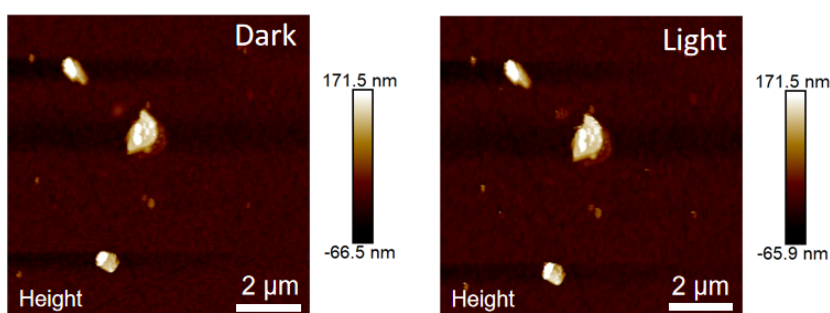

**Figure S5.** AFM height images of TTED-Hg-AF obtained during KPFM measurements (a) before and (b) after light irradiation.

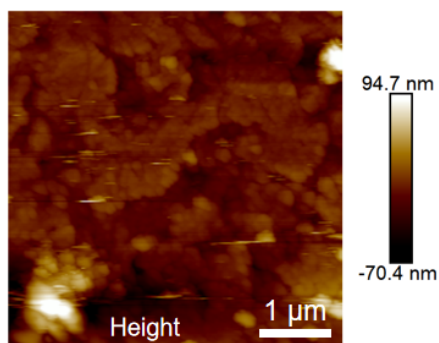

**Figure S6.** AFM height image of TTED-Hg-AF acquired during PFM measurements.

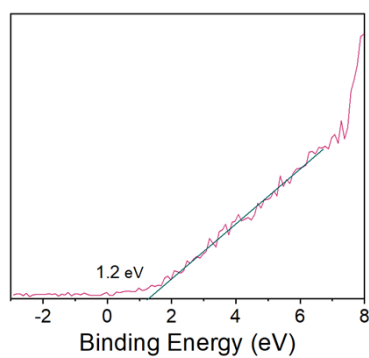

**Figure S7.** Valence band X-ray photoelectron spectroscopy (VB-XPS) spectrum of TTED-Hg-AF.

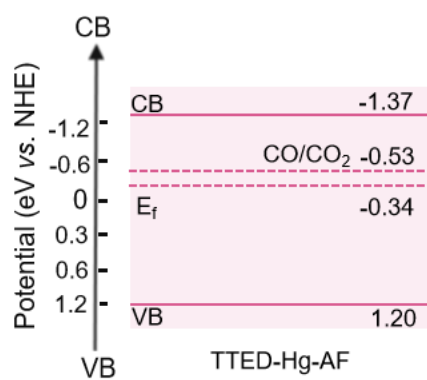

**Figure S8.** Schematic energy band structure diagram of TTED-Hg-AF determined from UV-vis DRS, Mott-Schottky, and VB-XPS measurements.

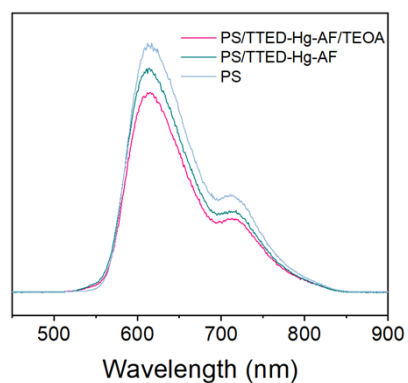

**Figure S9.** Photoluminescence (PL) spectra of  $[\text{Ru}(\text{bpy})_3]\text{Cl}_2$  photosensitizer (PS), PS/TTED-Hg-AF, and PS/TTED-Hg-AF/TEOA systems recorded under 400 nm excitation.

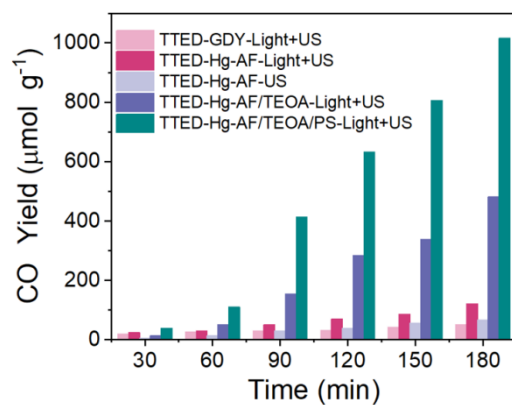

**Figure S10.** (a) Time-dependent CO production rates for various catalytic systems over 3 h of catalysis.

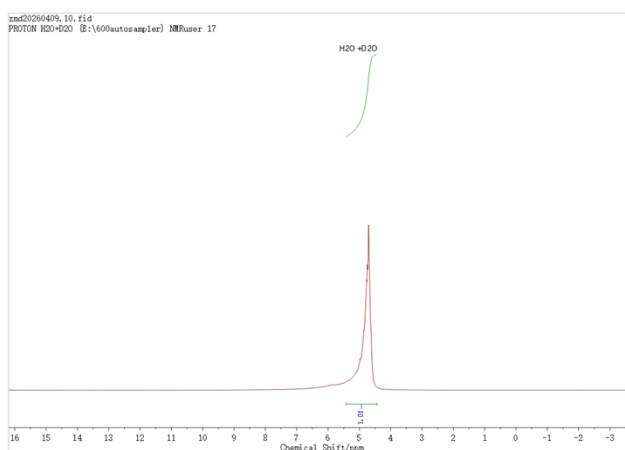

**Figure S11.**  $^1\text{H}$  NMR spectrum of reacted liquid.

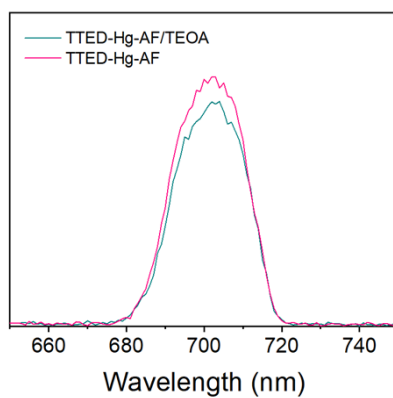

**Figure S12.** PL spectra of TTED-Hg-AF and TTED-Hg-AF/TEOA aqueous suspensions recorded under 350 nm excitation.

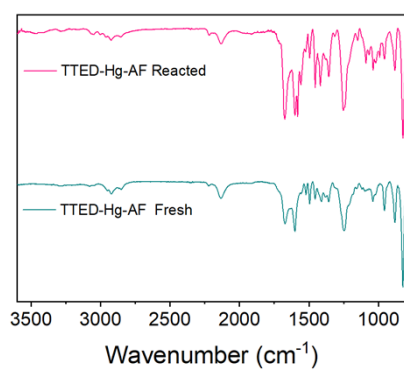

**Figure S13.** FTIR spectrum of TTED-Hg-AF before and after photocatalytic reaction.

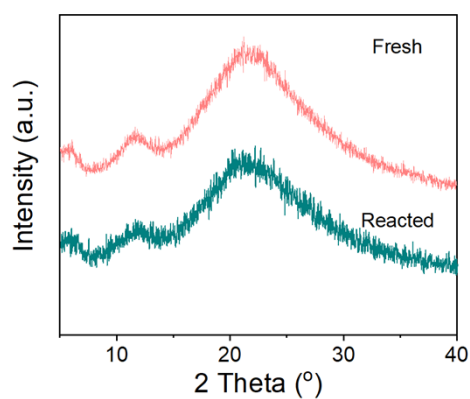

**Figure S14.** PXRD pattern of TTED-Hg-AF before and after photocatalytic reaction.

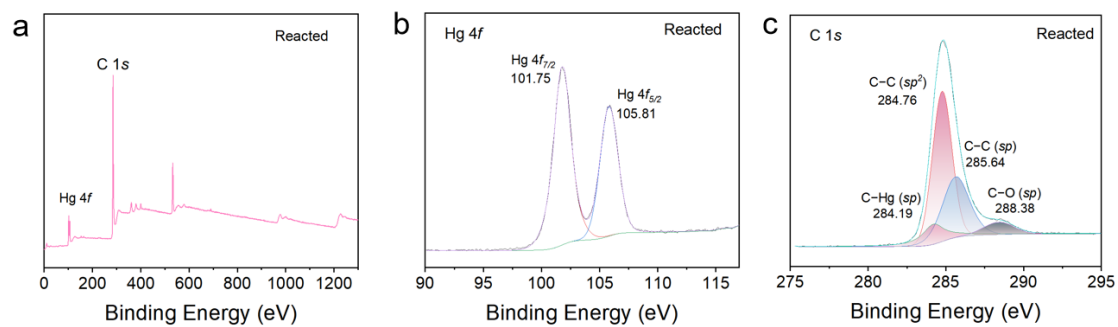

**Figure S15.** X-ray photoelectron spectroscopy (XPS) spectrum of TTED-Hg-AF after photocatalytic reaction.

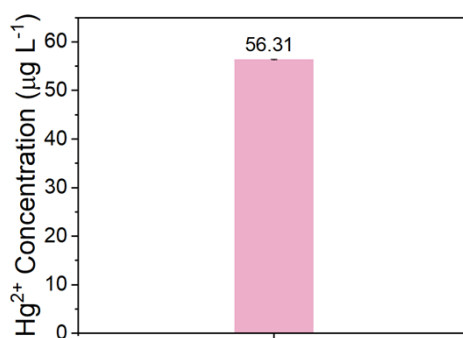

**Figure S16.** Hg<sup>2+</sup> leaching concentration after reaction.

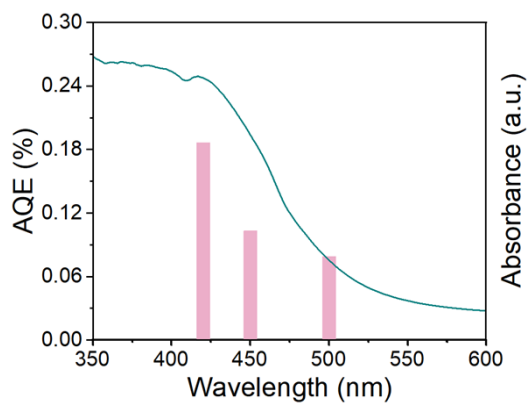

**Figure S17.** Apparent quantum efficiency (AQE) of TTED-Hg-AF powder measured at under 420, 450 and 500 nm wavelengths.

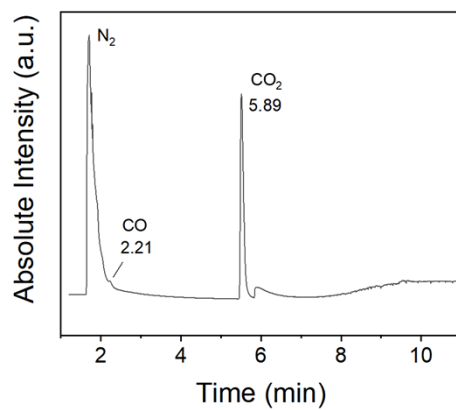

**Figure S18.** Total ion chromatographic (TIC) patterns for  $^{13}\text{CO}_2$  catalytic reduction.

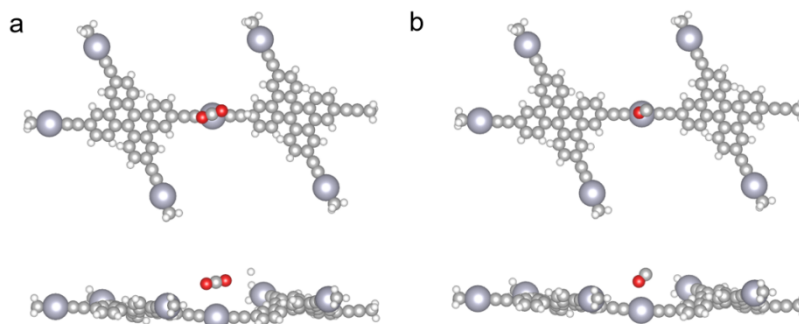

**Figure S19.** Optimized DFT geometries showing (a)  $^*\text{COOH}$  and (b)  $^*\text{CO}$  intermediates adsorbed on the TTED-Hg-AF surface.

### 3. References

1. G. Kresse and Furthmuller, *Phys. Rev. B: Condens. Matter Mater. Phys.*, 1996, **54**, 11169.
2. G. Kresse and D. Joubert, *Phys. Rev. B: Condens. Matter Mater. Phys.*, 1999, **59**, 1758.
3. P. Perdew, K. Burke and M. Ernzerhof, *Phys. Rev. Lett.* 1996, **77**, 3865.
